# Supplementary material for: Manipulation under Anesthesia versus Non-Surgical Treatment for Patients with Frozen Shoulder Contracture Syndrome: A Systematic Review
Source: Int J Environ Res Public Health. 2022 Aug 7;19(15):9715. doi: 10.3390/ijerph19159715 (PMC9368476; doi:10.3390/ijerph19159715)
Supplement: Supplementary file 1 [file ijerph-19-09715-s001.zip]

Archive with 4 entries (4 files):
- IJERPH _ Table S1.pdf
- IJERPH _ Table S2.pdf
- IJERPH _ Table S3.pdf
- IJERPH _ Table S4.pdf
