# Supplementary material for: Manipulation under Anesthesia versus Non-Surgical Treatment for Patients with Frozen Shoulder Contracture Syndrome: A Systematic Review
Source: Int J Environ Res Public Health. 2022 Aug 7;19(15):9715. doi: 10.3390/ijerph19159715 (PMC9368476; doi:10.3390/ijerph19159715)
Supplement: Supplementary file 1 [file ijerph-19-09715-s001.zip › IJERPH _ Table S2.pdf]

## Supplementary materials

Table S2. RCTs excluded with reason.

| Author, year                          | Title, journal                                                                                                                                                                                                                                             | Reason for exclusion                            | Intervention group                                                                 | Control group                                                                |
|---------------------------------------|------------------------------------------------------------------------------------------------------------------------------------------------------------------------------------------------------------------------------------------------------------|-------------------------------------------------|------------------------------------------------------------------------------------|------------------------------------------------------------------------------|
| <b>Amir-Us-Saqlain et al<br/>2007</b> | Functional outcome of frozen shoulder after manipulation under anaesthesia.<br><i>J Pak Med Assoc 57(4): 181-185.</i>                                                                                                                                      | Different comparison                            | Manipulation under anesthesia<br>Steroid injection<br>Extremity kept in ABD and ER | Manipulation under anesthesia<br>Steroid injection                           |
| <b>Atalay et al<br/>2021</b>          | Clinical effects of suprascapular nerve block in addition to intra-articular corticosteroid injection in the early stages of adhesive capsulitis:<br>A singleblind, randomized controlled trial.<br><i>Acta Orthop Traumatol Turc 2021; 55(6): 459-465</i> | Different comparison                            | Scapular nerve block procedures<br>Steroid injection                               | Steroid injection                                                            |
| <b>Hussainet et al<br/>2018</b>       | Outcome of manipulation under anesthesia in treatment of frozen shoulder with and without steroid injection in terms of range of motion.<br><i>Medical Forum Monthly 29(2): 79-83.</i>                                                                     | Different comparison                            | Manipulation under anesthesia<br>Steroid injection                                 | Manipulation under anesthesia                                                |
| <b>Jones et al<br/>2000</b>           | Suprascapular nerve block for the treatment of frozen shoulder in primary care:<br>a randomized trial.<br><i>Br J Gen Pract 49(438): 39-41.</i>                                                                                                            | Different intervention features                 | Scapular nerve block procedures                                                    | Steroid injection                                                            |
| <b>Karatas et al<br/>2002</b>         | Suprascapular nerve block for pain relief in adhesive capsulitis:<br>comparison of 2 different techniques.<br><i>Arch Phys Med Rehabil 83(5): 593-597.</i>                                                                                                 | Different intervention features                 | Scapular nerve block procedures<br>(needle tip guided)                             | Scapular nerve block procedures<br>(near-nerve electromiographically guided) |
| <b>Kivimäki et al<br/>2001</b>        | Manipulation under anesthesia for frozen shoulder with and without steroid injection.<br><i>Arch Phys Med Rehabil 82(9): 1188-1190.</i>                                                                                                                    | Different comparison                            | Manipulation under anesthesia<br>Steroid injection                                 | Manipulation under anesthesia                                                |
| <b>Kivimäki et al<br/>2002</b>        | The effectiveness of manipulation under anesthesia for the frozen shoulder. Randomized controlled trial.<br>(na)                                                                                                                                           | Different language<br>(other language: Finnish) | Manipulation under anesthesia                                                      | Physical therapy exercise advice                                             |
