# Supplementary material for: Manipulation under Anesthesia versus Non-Surgical Treatment for Patients with Frozen Shoulder Contracture Syndrome: A Systematic Review
Source: Int J Environ Res Public Health. 2022 Aug 7;19(15):9715. doi: 10.3390/ijerph19159715 (PMC9368476; doi:10.3390/ijerph19159715)
Supplement: Supplementary file 1 [file ijerph-19-09715-s001.zip › IJERPH _ Table S3.pdf]

## Supplementary materials

**Table S3.** Other excluded studies with reason.

| Author, year                     | Title, journal                                                                                                                                                                                                    | Reason for exclusion                            |
|----------------------------------|-------------------------------------------------------------------------------------------------------------------------------------------------------------------------------------------------------------------|-------------------------------------------------|
| <b>Ahmad et al.<br/>2014</b>     | Outcome of manipulation under anaesthesia in adhesive capsulitis patients.<br><i>J Coll Physicians Surg Pak</i> 24(4): 293-294.                                                                                   | Different study design<br>(case series)         |
| <b>Andersen et al.<br/>1998</b>  | Frozen shoulder: arthroscopy and manipulation under general anesthesia and early passive motion.<br><i>J Shoulder Elbow Surg</i> 7(3): 218-222.                                                                   | Different study design<br>(case series)         |
| <b>Ando et al.<br/>2018</b>      | Short-term Clinical Results of Manipulation Under Ultrasound-Guided Brachial Plexus Block in Patients with Idiopathic Frozen Shoulder and Diabetic Secondary Frozen Shoulder.<br><i>Open Orthop J</i> 12: 99-104. | Different intervention/comparison features      |
| <b>Dodenhoff et al.<br/>2000</b> | Manipulation under anesthesia for primary frozen shoulder: effect on early recovery and return to activity.<br><i>J Shoulder Elbow Surg</i> 9(1): 23-26.                                                          | Different study design<br>(case series)         |
| <b>Fahmy et al.<br/>2018</b>     | Under Anesthesia Thaws Frozen Shoulder.<br><i>J Am Osteopath Assoc</i> 118(7): 485-486.                                                                                                                           | Different study design<br>(clinical commentary) |
| <b>Farrell et al.<br/>2005</b>   | Manipulation for frozen shoulder: long-term results.<br><i>J Shoulder Elbow Surg</i> 14(5): 480-484.                                                                                                              | Insufficient available data                     |
| <b>Flannery et al.<br/>2007</b>  | Adhesive shoulder capsulitis: does the timing of manipulation influence outcome?<br><i>Acta Orthop Belg</i> 73(1): 21-25.                                                                                         | Insufficient available data                     |
| <b>Ghosh et al.<br/>(na)</b>     | Comparison of results of three different methods of treatment for adhesive capsulitis of shoulder.<br><i>J Indian Med Assoc</i> 110(11): 827-828.                                                                 | Full-text not available after author's request  |
| <b>Hamdan et al.<br/>2003</b>    | Manipulation under anaesthesia for the treatment of frozen shoulder.<br><i>Int Orthop</i> 27(2): 107-109.                                                                                                         | Different study design<br>(case series)         |
| <b>Helbig et al.</b>             | Mobilization of frozen shoulder under general anaesthesia.<br><i>Acta Orthop Belg</i> 49(1): 267-274.                                                                                                             | Different study design<br>(case series)         |
| <b>Hsu et al.<br/>1991</b>       | Arthroscopic distension in the management of frozen shoulder<br><i>Int Orthop</i> 15(2): 79-83.                                                                                                                   | Different study design<br>(case series)         |
| <b>Jacchia et al.</b>            | [Mobilization under anesthesia in periarthritis of the shoulder].                                                                                                                                                 | Different study design                          |

|                         |                                                                                                                                                                                                         |                                                |
|-------------------------|---------------------------------------------------------------------------------------------------------------------------------------------------------------------------------------------------------|------------------------------------------------|
| 1968                    | <i>Arch Putti Chir Organi Mov</i> 23: 231-241.                                                                                                                                                          | (book chapter)                                 |
| Jacobs et al.<br>2005   | Comparision of manipulation under anaesthetic and distension injections in the management of frozen shoulder.                                                                                           | Different study design<br>(meeting abstract)   |
| Jenkins et al.<br>2012  | The outcome of manipulation under general anesthesia for the management of frozen shoulder in patients with diabetes mellitus.<br><i>J Shoulder Elbow Surg</i> 21(11): 1492-1498.                       | Different intervention/comparison features     |
| Khan et al.<br>2009     | Manipulation under local anesthesia in idiopathic frozen shoulder--a new effective and simple technique.<br><i>Nepal Med Coll J</i> 11(4): 247-253.                                                     | Insufficient available data                    |
| Kraal et al.<br>2019    | Manipulation under anesthesia for frozen shoulders: a retrospective cohort study.<br><i>Acta orthopaedica Belgica</i> 85(4):400-405.                                                                    | Different study design<br>(case series)        |
| Loyd et al.<br>1983     | Adhesive capsulitis of the shoulder: arthrographic diagnosis and treatment.<br><i>South Med J</i> 76(7): 879-883.                                                                                       | Different study scope                          |
| Mahmood et al.<br>2018  | Outcome of manipulation under anesthesia in frozen shoulder with and without steroid injection in terms of range of motion.<br><i>Pakistan Journal of Medical and Health Sciences</i> 12(4): 1699-1702. | Kinship                                        |
| McKean et al.<br>2018   | Shoulder manipulation under targeted ultrasound-guided rotator interval block for adhesive capsulitis.<br><i>Skeletal Radiol</i> 48(8): 1269-1274.                                                      | Different intervention/comparison features     |
| Melzer et al.<br>1995   | Frozen shoulder--treatment and results.<br><i>Arch Orthop Trauma Surg</i> 114(2): 87-91.                                                                                                                | Different study design<br>(case series)        |
| Meyer et al.<br>2015    | [Management of Idiopathic Frozen Shoulder - Prospective Evaluation of Mobilisation under Anaesthesia and an Additional Subacromial Cortisone Injection].<br><i>Z Orthop Unfall</i> 153(6): 613-617.     | Different intervention/comparison features     |
| Ng et al.<br>2009       | Manipulation under anaesthesia and early physiotherapy facilitate recovery of patients with frozen shoulder syndrome.<br><i>Scott Med J</i> 54(1): 29-31.                                               | Insufficient available data                    |
| Omari et al.<br>2001    | Open surgical release for frozen shoulder: surgical findings and results of the release.<br><i>J Shoulder Elbow Surg</i> 10(4): 353-357.                                                                | Different intervention/comparison features     |
| Othman et al.<br>2002   | Manipulation under anaesthesia for frozen shoulder.<br><i>Int Orthop</i> 26(5): 268-270.                                                                                                                | Insufficient available data                    |
| Pap et al.<br>1998      | [Results of mobilization under anesthesia in adhesive capsulitis in relation to stage of the disease].<br><i>Z Orthop Ihre Grenzgeb</i> 136(1): 13-17.                                                  | Insufficient available data                    |
| Placzek et al.<br>1998  | Long-term effectiveness of translational manipulation for adhesive capsulitis.<br><i>Clin Orthop Relat Res</i> (356): 181-191.                                                                          | Different intervention/comparison features     |
| Quraishi et al.<br>2008 | Thawing the frozen shoulder - a randomised controlled trial of manipulation under anaesthetic versus hydrodilatation.                                                                                   | Different study design<br>(meeting abstract)   |
| Reichmister et al.      |                                                                                                                                                                                                         | Full-text not available after author's request |

|                            |                                                                                                                                                                                                                                   |                                                |
|----------------------------|-----------------------------------------------------------------------------------------------------------------------------------------------------------------------------------------------------------------------------------|------------------------------------------------|
| (na)                       | Long-term functional results after manipulation of the frozen shoulder.<br><i>Md Med J 48(1): 7-11.</i>                                                                                                                           |                                                |
| Rendeiro et al.<br>2019    | Effectiveness of translational manipulation under interscalene block for the treatment of adhesive capsulitis of the shoulder.<br>A nonrandomized clinical trial.<br><i>Physiother Theory Pract 35(8): 703-723.</i>               | Different intervention/comparison features     |
| Rill et al.<br>2011        | Predictors of outcome after nonoperative and operative treatment of adhesive capsulitis.<br><i>Am J Sports Med 39(3): 567-574.</i>                                                                                                | Different study scope                          |
| Sasanuma et al.<br>2016    | Magnetic resonance imaging and short-term clinical results of severe frozen shoulder treated with manipulation under ultrasound-guided cervical nerve root block.<br><i>Journal of Shoulder and Elbow Surgery 25(1): e13-e20.</i> | Different study design<br>(case series)        |
| Sharma et al.<br>1993      | Frozen shoulder syndrome. A comparison of hydraulic distension and manipulation.<br><i>Int Orthop 17(5): 275-278.</i>                                                                                                             | Different intervention/comparison features     |
| Singh et al.<br>(na)       | Manipulation under anaesthesia for treatment of adhesive capsulitis with early physiotherapy - A pilot study.<br><i>JMS - Journal of Medical Society 24(1): 12-15.</i>                                                            | Full-text not available after author's request |
| Song et al.<br>2021        | Outcome of manipulation under anesthesia with or without intra-articular steroid injection for treating frozen shoulder: A retrospective cohort study.<br><i>Medicine (Baltimore) 100(13):e23893.</i>                             | Different study design<br>(case series)        |
| Sokk et al.<br>2012        | Recovery of shoulder muscle function characteristics and active range of motion in patients with frozen shoulder after manipulation under anesthesia.<br><i>European Orthopaedics and Traumatology 3(3): 169-176.</i>             | Insufficient available data                    |
| Sokk et al.<br>2012        | Shoulder muscle isometric strength and active range of motion in patients with frozen shoulder syndrome after manipulation under anesthesia.<br><i>Medicina (Lithuania) 48(7): 331-337.</i>                                       | Insufficient available data                    |
| Sokk et al.<br>2013        | Shoulder muscle function in frozen shoulder syndrome patients following manipulation under anesthesia: A 6-month follow-up study.<br><i>Orthopaedics and Traumatology: Surgery and Research 99(6): 699-705.</i>                   | Different study scope                          |
| Takahashi et al.<br>2020   | Clinical results of shoulder manipulation under ultrasound-guided cervical nerve root block for frozen shoulder in patients with diabetes.<br><i>Journal of orthopaedics: 297-301.</i>                                            | Different intervention/comparison features     |
| Theodorides et al.<br>2012 | Factors affecting short- and long-term outcomes of manipulation under anaesthesia in patients with adhesive capsulitis of the shoulder.<br><i>Shoulder Elbow 6(4): 245-256.</i>                                                   | Different study scope                          |
| Thomas et al.<br>2011      | Treatment of frozen shoulder by manipulation under anaesthetic and injection: does the timing of treatment affect the outcome?<br><i>J Bone Joint Surg Br 93(10): 1377-1381.</i>                                                  | Different study scope                          |
| Tsvieli et al.<br>2017     | Manipulation under anaesthetic for frozen shoulder using Codman's paradox: a safe and early return of function.<br><i>Int Orthop 42(2): 339-344.</i>                                                                              | Insufficient available data                    |
| Van Royen et al.<br>1996   | Treatment of frozen shoulder by distension and manipulation under local anaesthesia.<br><i>Int Orthop 20(4): 207-210.</i>                                                                                                         | Different intervention/comparison features     |

|                                 |                                                                                                                                                                                                              |                                                           |
|---------------------------------|--------------------------------------------------------------------------------------------------------------------------------------------------------------------------------------------------------------|-----------------------------------------------------------|
| <b>Vastamaki et al.</b><br>2012 | The natural history of idiopathic frozen shoulder: a 2- to 27-year followup study.<br><i>Clin Orthop Relat Res</i> 470(4): 1133-1143.                                                                        | Critical risk of bias after ROBINS-I assessment for NRSI* |
| <b>Vastamaki et al.</b><br>2013 | Optimal time for manipulation of frozen shoulder may be between 6 and 9 months.<br><i>Scand J Surg</i> 104(4): 260-266.                                                                                      | Insufficient available data                               |
| <b>Vastamaki et al.</b><br>2015 | Motion and pain relief remain 23 years after manipulation under anesthesia for frozen shoulder.<br><i>Clin Orthop Relat Res</i> 471(4): 1245-1250.                                                           | Kinship                                                   |
| <b>Wallny et al.</b><br>1997    | ["Primary" shoulder stiffness: illness duration and therapeutic comparison].<br><i>Z Orthop Ihre Grenzgeb</i> 135(3): 222-227.                                                                               | Different study scope                                     |
| <b>Wang et al.</b><br>2007      | Comparison of idiopathic, post-trauma and post-surgery frozen shoulder after manipulation under anesthesia.<br><i>Int Orthop</i> 31(3): 333-337.                                                             | Different intervention/comparison features                |
| <b>Wang et al.</b><br>2010      | Manipulation under anaesthesia for frozen shoulder in patients with and without non-insulin dependent diabetes mellitus.<br><i>International Orthopaedics</i> 34(8): 1227-1232.                              | Kinship                                                   |
| <b>Weber et al.</b><br>1995     | Long-term follow up to patients with frozen shoulder after mobilization under anesthesia, with special reference to the rotator cuff.<br><i>Clin Rheumatol</i> 14(6): 686-691.                               | Different study scope                                     |
| <b>Weiser et al.</b><br>1977    | Painful primary frozen shoulder mobilization under local anesthesia.<br><i>Arch Phys Med Rehabil</i> 58(9): 406-408.                                                                                         | Different study design<br>(case series)                   |
| <b>Wiley et al.</b><br>1991     | Arthroscopic appearance of frozen shoulder.<br><i>Arthroscopy</i> 7(2): 138-143.                                                                                                                             | Different study scope                                     |
| <b>Woods et al.</b><br>2017     | Recurrence of frozen shoulder after manipulation under anaesthetic (MUA): the results of repeating the MUA.<br><i>Bone Joint J</i> 99(6): 812-817.                                                           | Different intervention/comparison features                |
| <b>Zhang et al.</b><br>2020     | Back arm flexion and extension combined with manipulation for the treatment of patients with adhesive scapulohumeral periarthritis.<br><i>China Journal of orthopaedics and traumatology</i> 33(7): 662-664. | Different study design<br>(case series)                   |
